# Supplementary material for: Sedentary Behavior Is Only Marginally Associated with Physical Function in Adults Aged 40–75 Years—the Maastricht Study
Source: PubMed Central journal article supplement (PMC5403943; doi:10.3389/fphys.2017.00242), 2017-04-25
Supplement: Table1.pdf [file Table1.pdf]

1 **Supplemental Table 1:** Differences in distance during a six minute walk test (6WMD), timed chair rise stand test performance (TCST  
2 time), grip strength, elbow flexion strength, and knee extension strength expressed per one standard deviation (SD) of sedentary time,  
3 total physical activity (PA), and higher intensity physical activity (HPA)  
4

|                |                                                | Sedentary time |                 | Total PA |                | HPA   |                |
|----------------|------------------------------------------------|----------------|-----------------|----------|----------------|-------|----------------|
|                |                                                | B              | 95% CI          | B        | 95% CI         | B     | 95% CI         |
| <b>Model 1</b> | 6 MWT distance (m)                             | -12.29         | (-15.67; -8.90) | 16.54    | (13.36; 19.73) | 18.47 | (15.29; 21.64) |
|                | TCST time (s)*                                 | 0.50           | (0.24; 0.75)    | -0.60    | (-0.84; -0.35) | -0.85 | (-1.09; -0.61) |
|                | Grip strength (kg kg <sup>-1</sup> )           | -0.01          | (-0.02; -0.01)  | 0.01     | (0.01; 0.02)   | 0.01  | (0.00; 0.01)   |
|                | Elbow flexion strength (Nm kg <sup>-1</sup> )  | -0.03          | (-0.05; -0.02)  | 0.04     | (0.02; 0.05)   | 0.03  | (0.02; 0.05)   |
|                | Knee extension strength (Nm kg <sup>-1</sup> ) | -0.04          | (-0.06; -0.02)  | 0.05     | (0.03; 0.07)   | 0.07  | (0.05; 0.09)   |
| <b>Model 2</b> | 6 MWT distance (m)                             | -7.23          | (-10.69; -3.78) |          |                | 16.44 | (13.13; 19.75) |
|                | TCST time (s)*                                 | 0.26           | (-0.02; 0.52)   |          |                | -0.78 | (-1.03; -0.53) |
|                | Grip strength (kg kg <sup>-1</sup> )           | -0.01          | (-0.02; -0.01)  |          |                | 0.01  | (0.01; 0.02)   |
|                | Elbow flexion strength (Nm kg <sup>-1</sup> )  | -0.03          | (-0.04; -0.01)  |          |                | 0.03  | (0.02; 0.04)   |
|                | Knee extension strength (Nm kg <sup>-1</sup> ) | -0.02          | (-0.05; 0.00)   |          |                | 0.06  | (0.04; 0.08)   |
| <b>Model 3</b> | 6 MWT distance (m)                             | -4.43          | (-7.72; -1.14)  | 11.13    | (8.04; 14.22)  | 12.79 | (9.10; 15.45)  |
|                | TCST time (s)*                                 | 0.19           | (-0.08; 0.45)   | -0.45    | (-0.70; -0.20) | -0.68 | (-0.93; -0.42) |
|                | Grip strength (kg kg <sup>-1</sup> )           | -0.01          | (-0.01; 0.00)   | 0.00     | (0.00; 0.01)   | 0.00  | (0.00; 0.01)   |
|                | Elbow flexion strength (Nm kg <sup>-1</sup> )  | -0.02          | (-0.03; -0.01)  | 0.02     | (0.01; 0.03)   | 0.01  | (0.00; 0.03)   |
|                | Knee extension strength (Nm kg <sup>-1</sup> ) | -0.01          | (-0.03; 0.01)   | 0.03     | (0.01; 0.05)   | 0.04  | (0.02; 0.06)   |

5 Results are presented as unstandardized regression coefficients (B) with 95% confidence interval (95% CI). \*Negative coefficient indicates better performance.  
6 Associations were adjusted for the following covariates Model 1: waking time, age, sex, type 2 diabetes, and education level. Model 2: Models describing ST  
7 werte additionally adjusted for HPA. Models describing HPA were additionally adjusted for ST (due to collinearity models of total PA were not adjusted for ST).  
8 Model 3: model 2 +BMI, alcohol use, smoking status, cardiovascular disease, and health status. Each unit change (1 SD) corresponds with 1.65 hours for  
9 sedentary time, 0.68 hours (41 minutes) for total PA, and 0.30 hours (18 minutes) for HPA.

10
